# Supplementary material
Source: publisher site journal article supplement (https://www.dovepress.com/article/532009)
Supplement: Supplementary file 1 [file Supplementary%20materials%20%2525284%252529.pdf]

**Supplementary Table 1****Supplementary Table 1a.** Residual statistics

|     | DC    |      | Ks    |      | CA     |       |
|-----|-------|------|-------|------|--------|-------|
|     | Min   | Max  | Min   | Max  | Min    | Max   |
| SDE | -1.40 | 3.50 | -2.81 | 2.78 | -1.616 | 5.219 |
| COO | 0     | 0.09 | 0     | 0.06 | 0      | 0.17  |
| LEV | 0     | 0.24 | 0     | 0.24 | 0.01   | 0.236 |

SDE, studentized deleted residuals; COO, cook's distance; LEV, leverage values

**Supplementary Table 1b.** Regression analysis after excluding outliers

|    | $\beta$ (95%CI) | P     |
|----|-----------------|-------|
| DC | 0.24(0.12~0.42) | 0.001 |
| Ks | 0.38(0.04~0.71) | 0.030 |
| CA | 0.20(0.02~0.38) | 0.033 |
